# Supplementary material
Source: HighWire-hosted journal article supplement (https://www.annfammed.org/highwire/filestream/26847/field_highwire_adjunct_files/0/Shumer_Supp_Apps_1-2_Tables_1-7.pdf)
Supplement: Shumer_Supp_Apps_1-2_Tables_1-7.pdf [file Shumer_Supp_Apps_1-2_Tables_1-7.pdf]

### **Supplemental materials for**

Shumer G, Chen D, Holkeboer J, et al. Convenience or Continuity: When Are Patients Willing to Wait to See Their Own Doctor? *Ann Fam Med*. 2025;23(2):151-157.

## 2021 Survey – Translation Process

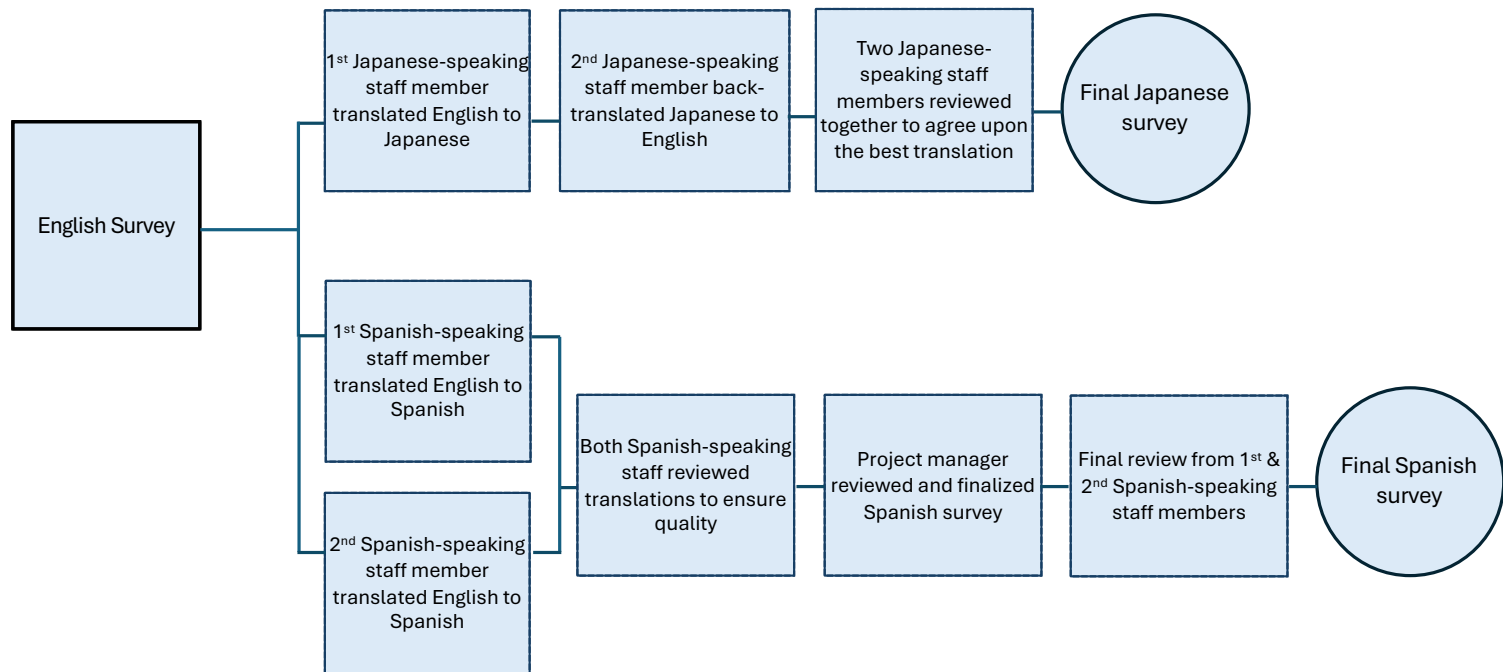

| Weighting Groups |        |                           | Survey<br>Proportion<br>N= 2319 | Population<br>Proportion<br>N=49107 | Weight |
|------------------|--------|---------------------------|---------------------------------|-------------------------------------|--------|
| Age              | Gender | Race                      |                                 |                                     |        |
| 18-40            | Female | Black or African American | 0.34%                           | 3.50%                               | 10.29  |
|                  | Female | White or Caucasian        | 9.14%                           | 14.09%                              | 1.54   |
|                  | Female | Others                    | 1.03%                           | 2.99%                               | 2.90   |
|                  | Male   | Black or African American | 0.04%                           | 1.49%                               | 37.25  |
|                  | Male   | White or Caucasian        | 2.46%                           | 9.04%                               | 3.67   |
|                  | Male   | Others                    | 0.30%                           | 2.02%                               | 6.73   |
|                  | Others | Black or African American | 0                               | 0.05%                               |        |
|                  | Others | White or Caucasian        | 0.52%                           | 0.37%                               | 0.71   |
|                  | Others | Others                    | 0                               | 0.04%                               |        |
| 41-60            | Female | Black or African American | 0.65%                           | 2.64%                               | 4.06   |
|                  | Female | White or Caucasian        | 21.82%                          | 14.89%                              | 0.68   |
|                  | Female | Others                    | 1.81%                           | 3.11%                               | 1.72   |
|                  | Male   | Black or African American | 0.22%                           | 1.67%                               | 7.59   |
|                  | Male   | White or Caucasian        | 9.40%                           | 11.65%                              | 1.24   |
|                  | Male   | Others                    | 1.16%                           | 2.64%                               | 2.28   |
|                  | Others | Black or African American | 0                               | 0.01%                               |        |
|                  | Others | White or Caucasian        | 0.26%                           | 0.08%                               | 0.31   |
|                  | Others | Others                    | 0.04%                           | 0.01%                               | 0.25   |
| >=61             | Female | Black or African American | 0.43%                           | 1.40%                               | 3.26   |
|                  | Female | White or Caucasian        | 29.15%                          | 13.99%                              | 0.48   |
|                  | Female | Others                    | 1.64%                           | 1.18%                               | 0.72   |
|                  | Male   | Black or African American | 0.09%                           | 0.85%                               | 9.44   |
|                  | Male   | White or Caucasian        | 18.20%                          | 11.20%                              | 0.62   |
|                  | Male   | Others                    | 1.16%                           | 1.06%                               | 0.91   |
|                  | Others | Black or African American | 0                               | 0                                   |        |
|                  | Others | White or Caucasian        | 0.13%                           | 0.04%                               | 0.31   |
|                  | Others | Others                    | 0                               | 0                                   |        |

Shumer Supplemental Tables 1-7

**Supplemental Table 1. Preference to only see PCP for a new symptom or problem**

| <b>Variables</b>                     | <b>Odds Ratio</b> | <b>95% CI</b> | <b>P-value</b> |
|--------------------------------------|-------------------|---------------|----------------|
| <b>Age</b>                           | 1.02              | (1.00, 1.03)  | 0.022          |
| <b>Gender</b> (ref: Male)            |                   |               |                |
| Female                               | 1.10              | (0.76, 1.57)  | 0.619          |
| Other                                | 1.67              | (0.49, 5.66)  | 0.409          |
| <b>Ethnicity</b> (ref: Non-hispanic) | 1.31              | (0.55, 3.08)  | 0.541          |
| <b>Education</b> (ref: Bachelors+)   |                   |               |                |
| <8th grade & HS/GED                  | 3.60              | (1.99, 6.50)  | <.001          |
| Some college/associates              | 1.74              | (1.15, 2.62)  | 0.008          |
| <b>Race</b> (ref: White)             |                   |               |                |
| Black or African American            | 2.18              | (1.01, 4.74)  | 0.049          |
| Asian                                | 2.50              | (1.31, 4.76)  | 0.005          |
| Other                                | 1.85              | (1.06, 3.23)  | 0.031          |
| <b>Insurance</b> (Ref: Public)       | 1.37              | (0.93, 2.03)  | 0.114          |
| <b>Sites</b> (Ref: Non-resident)     | 0.73              | (0.49, 1.09)  | 0.120          |
| <b>What Matters Index</b>            | 1.16              | (1.00, 1.36)  | 0.057          |

**Supplemental Table 2. Preference to only see PCP for an urgent concern**

| <b>Variables</b>                     | <b>Odds Ratio</b> | <b>95% CI</b> | <b>P-value</b> |
|--------------------------------------|-------------------|---------------|----------------|
| <b>Age</b>                           | 1.02              | (0.99, 1.05)  | 0.154          |
| <b>Gender</b> (ref: Male)            |                   |               |                |
| Female                               | 0.45              | (0.26, 0.77)  | 0.004          |
| Other                                | 0.00              | (0.00, 0.00)  | <.001          |
| <b>Ethnicity</b> (ref: Non-hispanic) | 0.43              | (0.09, 2.12)  | 0.301          |
| <b>Education</b> (ref: Bachelors+)   |                   |               |                |
| <8th grade & HS/GED                  | 3.57              | (1.59, 8.02)  | 0.002          |
| Some college/associates              | 2.75              | (1.57, 4.83)  | <.001          |
| <b>Race</b> (ref: White)             |                   |               |                |
| Black or African American            | 2.82              | (1.11, 7.17)  | 0.030          |
| Asian                                | 0.94              | (0.32, 2.78)  | 0.917          |
| Other                                | 2.57              | (1.07, 6.15)  | 0.035          |
| <b>Insurance</b> (Ref: Public)       | 0.87              | (0.44, 1.72)  | 0.680          |
| <b>Sites</b> (Ref: Non-resident)     | 0.73              | (0.40, 1.32)  | 0.297          |
| <b>What Matters Index</b>            | 1.21              | (0.95, 1.55)  | 0.126          |

**Supplemental Table 3. Preference to only see PCP for follow-up of a mental health condition**

| <b>Variables</b>                     | <b>Odds Ratio</b> | <b>95% CI</b> | <b>P-value</b> |
|--------------------------------------|-------------------|---------------|----------------|
| <b>Age</b>                           | 0.99              | (0.98, 1.01)  | 0.308          |
| <b>Gender</b> (ref: Male)            |                   |               |                |
| Female                               | 1.16              | (0.88, 1.54)  | 0.299          |
| Other                                | 0.59              | (0.23, 1.52)  | 0.271          |
| <b>Ethnicity</b> (ref: Non-hispanic) | 0.76              | (0.36, 1.62)  | 0.476          |
| <b>Education</b> (ref: Bachelors+)   |                   |               |                |
| <8th grade & HS/GED                  | 1.07              | (0.57, 1.98)  | 0.838          |
| Some college/associates              | 1.08              | (0.78, 1.49)  | 0.638          |
| <b>Race</b> (ref: White)             |                   |               |                |
| Black or African American            | 1.10              | (0.50, 2.42)  | 0.819          |
| Asian                                | 0.69              | (0.39, 1.21)  | 0.196          |
| Other                                | 0.65              | (0.38, 1.11)  | 0.113          |
| <b>Insurance</b> (Ref: Public)       | 1.29              | (0.92, 1.79)  | 0.135          |
| <b>Sites</b> (Ref: Non-resident)     | 0.94              | (0.66, 1.35)  | 0.741          |
| <b>What Matters Index</b>            | 1.11              | (0.98, 1.26)  | 0.097          |

**Supplemental Table 4. Preference to wait 3-4 weeks to see PCP for a new mental health concern**

| <b>Variables</b>                     | <b>Odds Ratio</b> | <b>95% CI</b> | <b>P-value</b> |
|--------------------------------------|-------------------|---------------|----------------|
| <b>Age</b>                           | 1.01              | (1.00, 1.02)  | 0.119          |
| <b>Gender</b> (ref: Male)            |                   |               |                |
| Female                               | 1.22              | (0.92, 1.62)  | 0.170          |
| Others                               | 1.66              | (0.59, 4.65)  | 0.337          |
| <b>Ethnicity</b> (ref: Non-hispanic) | 2.12              | (0.94, 4.76)  | 0.069          |
| <b>Education</b> (ref: Bachelors+)   |                   |               |                |
| <8th grade & HS/GED                  | 0.88              | (0.48, 1.62)  | 0.684          |
| Some college/associates              | 0.94              | (0.67, 1.30)  | 0.689          |
| <b>Race</b> (ref: White)             |                   |               |                |
| Black or African American            | 0.87              | (0.41, 1.86)  | 0.717          |
| Asian                                | 1.19              | (0.64, 2.21)  | 0.588          |
| Others                               | 0.79              | (0.46, 1.37)  | 0.400          |
| <b>Insurance</b> (Ref: Public)       | 1.21              | (0.85, 1.72)  | 0.279          |
| <b>Sites</b> (Ref: Non-resident)     | 0.69              | (0.48, 0.98)  | 0.039          |
| <b>What Matters Index</b>            | 1.02              | (0.90, 1.17)  | 0.721          |

**Supplemental Table 5. Preference to wait 3-4 weeks to see PCP for a new concern about a chronic condition**

| <b>Variables</b>                     | <b>Odds Ratio</b> | <b>95% CI</b> | <b>P-value</b> |
|--------------------------------------|-------------------|---------------|----------------|
| <b>Age</b>                           | 0.99              | (0.98, 1.01)  | 0.348          |
| <b>Gender</b> (ref: Male)            |                   |               |                |
| Female                               | 0.84              | (0.64, 1.11)  | 0.226          |
| Others                               | 0.95              | (0.36, 2.46)  | 0.911          |
| <b>Ethnicity</b> (ref: Non-hispanic) | 1.57              | (0.65, 3.78)  | 0.316          |
| <b>Education</b> (ref: Bachelors+)   |                   |               |                |
| <8th grade & HS/GED                  | 0.69              | (0.35, 1.33)  | 0.266          |
| Some college/associates              | 0.83              | (0.59, 1.16)  | 0.269          |
| <b>Race</b> (ref: White)             |                   |               |                |
| Black or African American            | 0.82              | (0.40, 1.70)  | 0.593          |
| Asian                                | 0.78              | (0.41, 1.47)  | 0.444          |
| Others                               | 0.59              | (0.34, 1.03)  | 0.063          |
| <b>Insurance</b> (Ref: Public)       | 1.07              | (0.75, 1.52)  | 0.718          |
| <b>Sites</b> (Ref: Non-resident)     | 1.00              | (0.71, 1.42)  | 0.987          |
| <b>What Matters Index</b>            | 0.97              | (0.86, 1.10)  | 0.659          |



**Supplemental Table 6. Preference to wait 3-4 weeks to see PCP for evaluation of a sore throat**

| <b>Variables</b>                     | <b>Odds Ratio</b> | <b>95% CI</b> | <b>P-value</b> |
|--------------------------------------|-------------------|---------------|----------------|
| <b>Age</b>                           | 0.99              | (0.97, 1.01)  | 0.456          |
| <b>Gender</b> (ref: Male)            |                   |               |                |
| Female                               | 0.89              | (0.56, 1.40)  | 0.612          |
| Others                               | 3.37              | (0.85, 13.33) | 0.084          |
| <b>Ethnicity</b> (ref: Non-hispanic) | 0.92              | (0.31, 2.78)  | 0.883          |
| <b>Education</b> (ref: Bachelors+)   |                   |               |                |
| <8th grade & HS/GED                  | 2.45              | (1.14, 5.27)  | 0.022          |
| Some college/associates              | 1.20              | (0.65, 2.20)  | 0.565          |
| <b>Race</b> (ref: White)             |                   |               |                |
| Black or African American            | 0.61              | (0.17, 2.22)  | 0.450          |
| Asian                                | 3.39              | (1.58, 7.24)  | 0.002          |
| Others                               | 1.04              | (0.45, 2.42)  | 0.921          |
| <b>Insurance</b> (Ref: Public)       | 0.78              | (0.42, 1.44)  | 0.423          |
| <b>Sites</b> (Ref: Non-resident)     | 1.71              | (1.01, 2.91)  | 0.047          |
| <b>What Matters Index</b>            | 0.96              | (0.80, 1.16)  | 0.688          |

**Supplemental Table 7. Preference to wait 3-4 weeks to see PCP for bodily pain symptoms**

| <b>Variables</b>                     | <b>Odds Ratio</b> | <b>95% CI</b> | <b>P-value</b> |
|--------------------------------------|-------------------|---------------|----------------|
| <b>Age</b>                           | 1.00              | (0.99, 1.01)  | 0.906          |
| <b>Gender</b> (ref: Male)            |                   |               |                |
| Female                               | 1.20              | (0.91, 1.57)  | 0.190          |
| Others                               | 3.35              | (1.26, 8.91)  | 0.015          |
| <b>Ethnicity</b> (ref: Non-hispanic) | 2.15              | (1.01, 4.57)  | 0.048          |
| <b>Education</b> (ref: Bachelors+)   |                   |               |                |
| <8th grade & HS/GED                  | 1.28              | (0.69, 2.37)  | 0.433          |
| Some college/associates              | 0.90              | (0.64, 1.26)  | 0.525          |
| <b>Race</b> (ref: White)             |                   |               |                |
| Black or African American            | 0.69              | (0.31, 1.55)  | 0.367          |
| Asian                                | 0.58              | (0.32, 1.05)  | 0.073          |
| Others                               | 0.54              | (0.30, 0.96)  | 0.037          |
| <b>Insurance</b> (Ref: Public)       | 1.05              | (0.76, 1.44)  | 0.771          |
| <b>Sites</b> (Ref: Non-resident)     | 0.83              | (0.61, 1.13)  | 0.229          |
| <b>What Matters Index</b>            | 1.07              | (0.95, 1.21)  | 0.248          |
